# Supplementary material for: A correlated ab initio quantum chemical study of the interaction of the Na+, Mg2+, Ca2+ and Zn2+ ions with the tautomers of cytosine in the presence of polar solvent
Source: Royal Society of Chemistry journal article supplement (doi:10.1039/c3cp51574e), 2013-01-01
Supplement: c3cp51574e.pdf [file c3cp51574e.pdf]

## Electronic Supporting Information

### **A Correlated Ab Initio Quantum Chemical Study of the Interaction of the Na<sup>+</sup>, Mg<sup>2+</sup>, Ca<sup>2+</sup> and Zn<sup>2+</sup> Ions with the Tautomers of Cytosine in Presence of Polar Solvent**

**Ivan V. Rostov and Rika Kobayashi**

Throughout the Electronic Supporting Information Section, the “Solvent” columns in tables and graphs show results for relative stabilities of tautomeric complexes calculated on the gas-phase geometries with addition of solvent effects (IEFPCM). The “Relaxation” data in tables and graphs were calculated with account of solvent effects as well, but on geometries equilibrated in presence of the solvent polarisation field.

**Table S1. Relative stabilities (in kcal/mol) of the cytosine tautomers calculated by the  $\omega$ B97XD, MP2, CCSD and CCSD(T) methods.**

| Cytosine       |           |         |            |      |           |         |            |      |           |         |         |           |         |
|----------------|-----------|---------|------------|------|-----------|---------|------------|------|-----------|---------|---------|-----------|---------|
| $\omega$ B97XD |           |         |            | MP2  |           |         |            | CCSD |           |         | CCSD(T) |           |         |
|                | Gas-Phase | Solvent | Relaxation |      | Gas-Phase | Solvent | Relaxation |      | Gas-Phase | Solvent |         | Gas-Phase | Solvent |
| cwc            | 0.0       | 0.0     | 0.0        | cwc  | 0.0       | 0.0     | 0.0        | cwc  | 0.0       | 0.0     | cwc     | 0.0       | 0.0     |
| ct1a           | 1.4       | 6.8     | 7.2        | ct1a | -1.4      | 3.4     | 3.9        | ct1a | -0.6      | 4.1     | ct1a    | -0.9      | 3.8     |
| ct1b           | 0.7       | 6.7     | 7.1        | ct1b | -1.9      | 3.3     | 3.8        | ct1b | -1.1      | 4.2     | ct1b    | -1.4      | 3.9     |
| ct2            | 7.1       | 5.4     | 5.0        | ct2  | 7.6       | 5.5     | 5.2        | ct2  | 7.7       | 6.1     | ct2     | 7.6       | 6.0     |
| ct3a           | 1.1       | 5.1     | 6.8        | ct3a | 1.1       | 4.8     | 5.3        | ct3a | -0.2      | 3.4     | ct3a    | 0.2       | 3.8     |
| ct3b           | 3.0       | 6.4     | 5.5        | ct3b | 2.8       | 6.0     | 6.4        | ct3b | 1.5       | 4.6     | ct3b    | 1.8       | 4.9     |
| ct4a           | 21.5      | 24.4    | 24.8       | ct4a | 19.6      | 21.9    | 22.4       | ct4a | 18.9      | 21.2    | ct4a    | 18.6      | 20.9    |
| ct4b           | 13.7      | 20.4    | 20.9       | ct4b | 11.7      | 17.9    | 18.3       | ct4b | 10.9      | 17.0    | ct4b    | 10.8      | 16.9    |
| ct4c           | 25.6      | 26.1    | 26.5       | ct4c | 23.3      | 23.6    | 24.0       | ct4c | 22.6      | 22.7    | ct4c    | 22.3      | 22.4    |
| ct4d           | 16.8      | 22.0    | 22.4       | ct4d | 14.5      | 19.3    | 19.7       | ct4d | 13.7      | 18.4    | ct4d    | 13.5      | 18.2    |
| ct5a           | 22.4      | 23.5    | 23.8       | ct5a | 19.8      | 20.8    | 21.2       | ct5a | 18.9      | 19.8    | ct5a    | 18.7      | 19.6    |
| ct5b           | 32.5      | 28.5    | 28.1       | ct5b | 30.2      | 26.1    | 25.7       | ct5b | 29.2      | 25.2    | ct5b    | 28.8      | 24.8    |
| ct5c           | 19.1      | 22.5    | 22.8       | ct5c | 16.5      | 19.7    | 20.0       | ct5c | 15.5      | 18.5    | ct5c    | 15.4      | 18.4    |
| ct5d           | 28.4      | 27.3    | 26.9       | ct5d | 26.1      | 24.8    | 24.4       | ct5d | 24.9      | 23.6    | ct5d    | 24.7      | 23.4    |

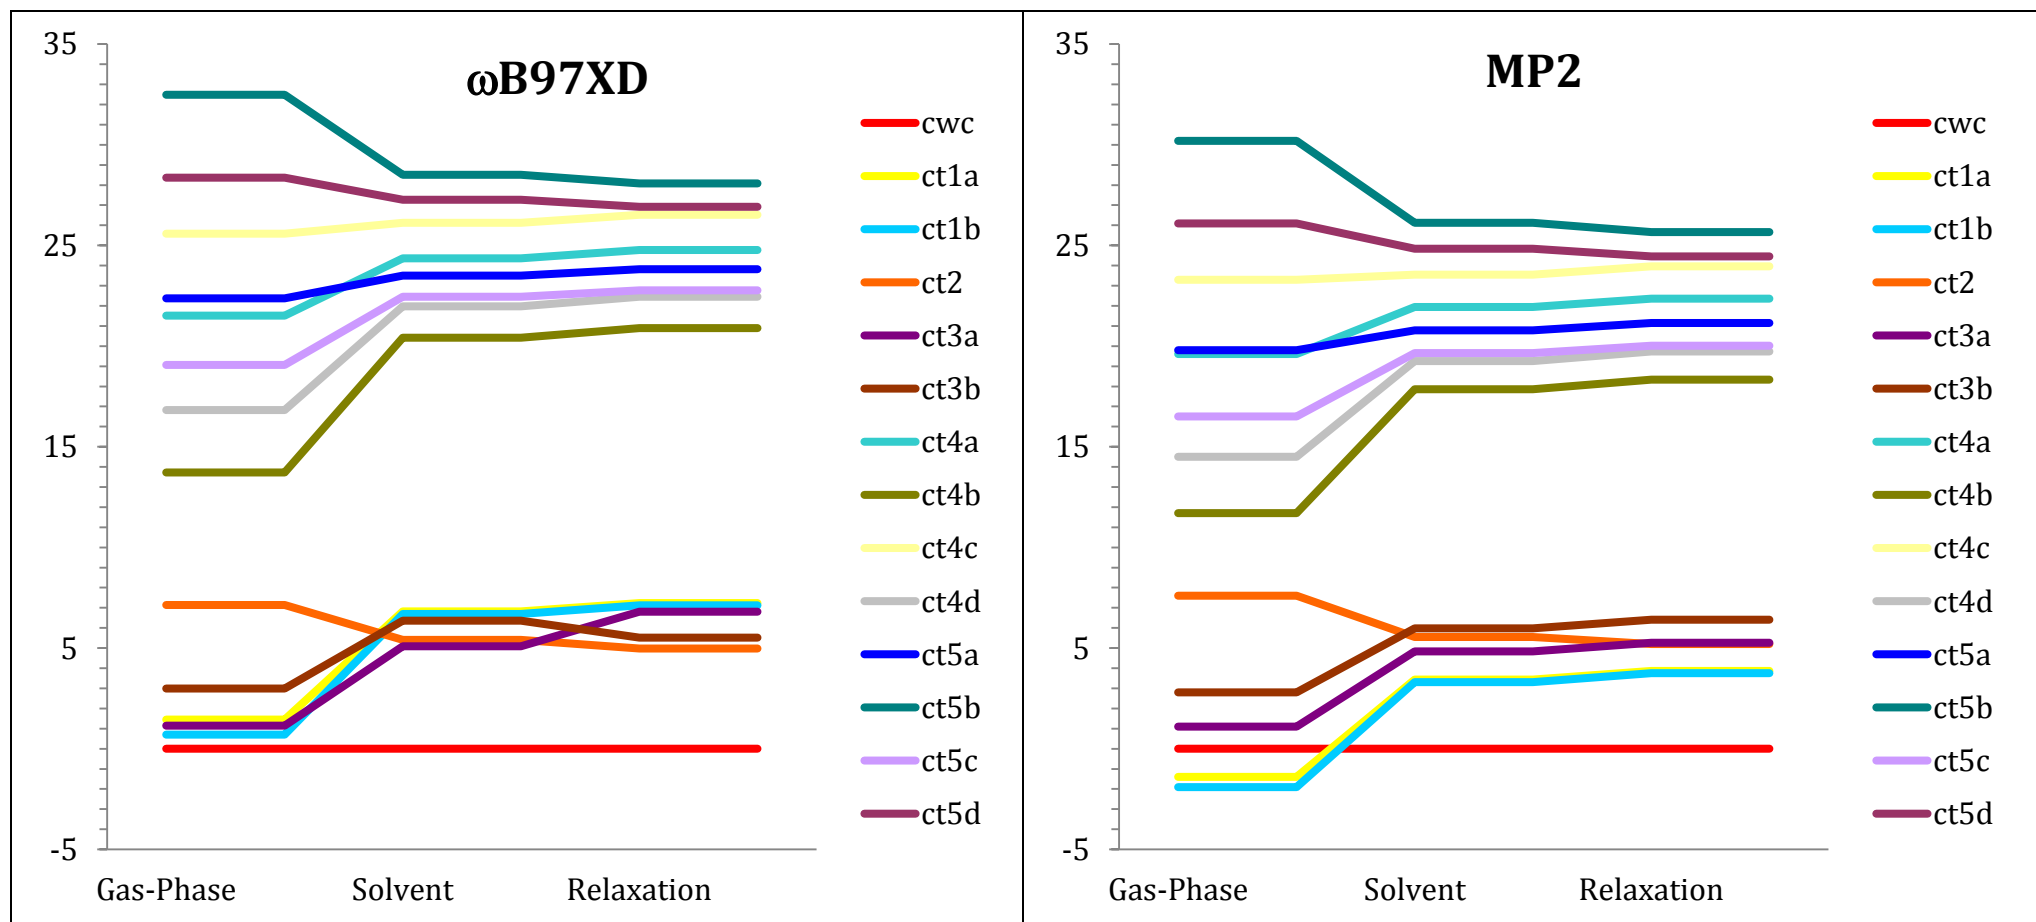

Fig. S1 Relative stabilities (in kcal/mol) of the cytosine tautomers calculated by the  $\omega$ B97XD and MP2 methods.

**Table S2. Relative stabilities (in kcal/mol) of the cytosine tautomers binding with Na<sup>+</sup> by the ωB97XD, MP2, CCSD and CCSD(T) methods.**

| Na <sup>+</sup> |           |         |            |        |           |         |            |        |           |         |         |           |         |
|-----------------|-----------|---------|------------|--------|-----------|---------|------------|--------|-----------|---------|---------|-----------|---------|
| ωB97XD          |           |         |            | MP2    |           |         |            | CCSD   |           |         | CCSD(T) |           |         |
|                 | Gas-Phase | Solvent | Relaxation |        | Gas-Phase | Solvent | Relaxation |        | Gas-Phase | Solvent |         | Gas-Phase | Solvent |
| cwc m           | 0.0       | 0.0     | 0.0        | cwc m  | 0.0       | 0.0     | 0.0        | cwc m  | 0.0       | 0.0     | cwc m   | 0.0       | 0.0     |
| cwc t           | –         | –       | –          | cwc t  | 19.7      | 15.1    | –          | cwc t  | 20.5      | 16.0    | cwc t   | 19.6      | 15.1    |
| ct1a b          | 10.0      | 9.9     | 9.3        | ct1a b | 7.0       | 7.2     | 7.0        | ct1a b | 8.2       | 8.5     | ct1a b  | 7.8       | 8.0     |
| ct1a t          | 28.4      | 16.9    | 11.9       | ct1a t | 25.1      | 14.5    | 10.7       | ct1a t | 26.8      | 16.2    | ct1a t  | 25.8      | 15.2    |
| ct1b m          | 14.5      | 10.7    | 9.6        | ct1b m | 11.4      | 7.9     | 7.4        | ct1b m | 12.6      | 9.2     | ct1b m  | 12.1      | 8.7     |
| ct1b t          | –         | –       | –          | ct1b t | 18.0      | 14.1    | –          | ct1b t | 19.6      | 15.7    | ct1b t  | 18.7      | 14.8    |
| ct2 b           | 4.6       | 4.8     | 5.0        | ct2 b  | 4.7       | 5.0     | 5.2        | ct2 b  | 5.1       | 5.4     | ct2 b   | 4.9       | 5.1     |
| ct3a b          | 18.7      | 9.7     | 8.9        | ct3a b | 19.5      | 10.7    | 9.7        | ct3a b | 18.1      | 9.3     | ct3a b  | 18.6      | 9.8     |
| ct3a t          | 19.2      | 7.9     | 7.6        | ct3a t | 20.8      | 9.3     | 8.8        | ct3a t | 20.5      | 9.1     | ct3a t  | 20.6      | 9.1     |
| ct3b b          | 22.6      | 11.2    | 10.4       | ct3b b | 23.4      | 12.0    | 11.1       | ct3b b | 21.9      | 10.5    | ct3b b  | 22.3      | 10.9    |
| ct3b t          | 19.5      | 8.7     | 8.5        | ct3b t | 21.1      | 10.0    | 9.6        | ct3b t | 20.8      | 9.8     | ct3b t  | 20.8      | 9.8     |
| ct5a t          | 21.2      | 22.9    | 22.8       | ct5a t | 19.1      | 20.7    | 20.5       | ct5a t | 18.8      | 20.3    | ct5a t  | 18.5      | 20.1    |
| ct5b t          | 25.0      | 26.5    | 26.5       | ct5b t | 22.9      | 24.3    | 24.3       | ct5b t | 22.5      | 23.9    | ct5b t  | 22.2      | 23.6    |
| ct5c t          | 27.0      | 23.1    | 23.2       | ct5c t | 26.6      | 22.2    | 22.0       | ct5c t | 26.6      | 22.3    | ct5c t  | 26.4      | 22.0    |
| ct5d t          | 35.5      | 27.4    | 27.3       | ct5d t | 35.2      | 26.7    | 26.3       | ct5d t | 35.3      | 26.7    | ct5d t  | 34.8      | 26.3    |

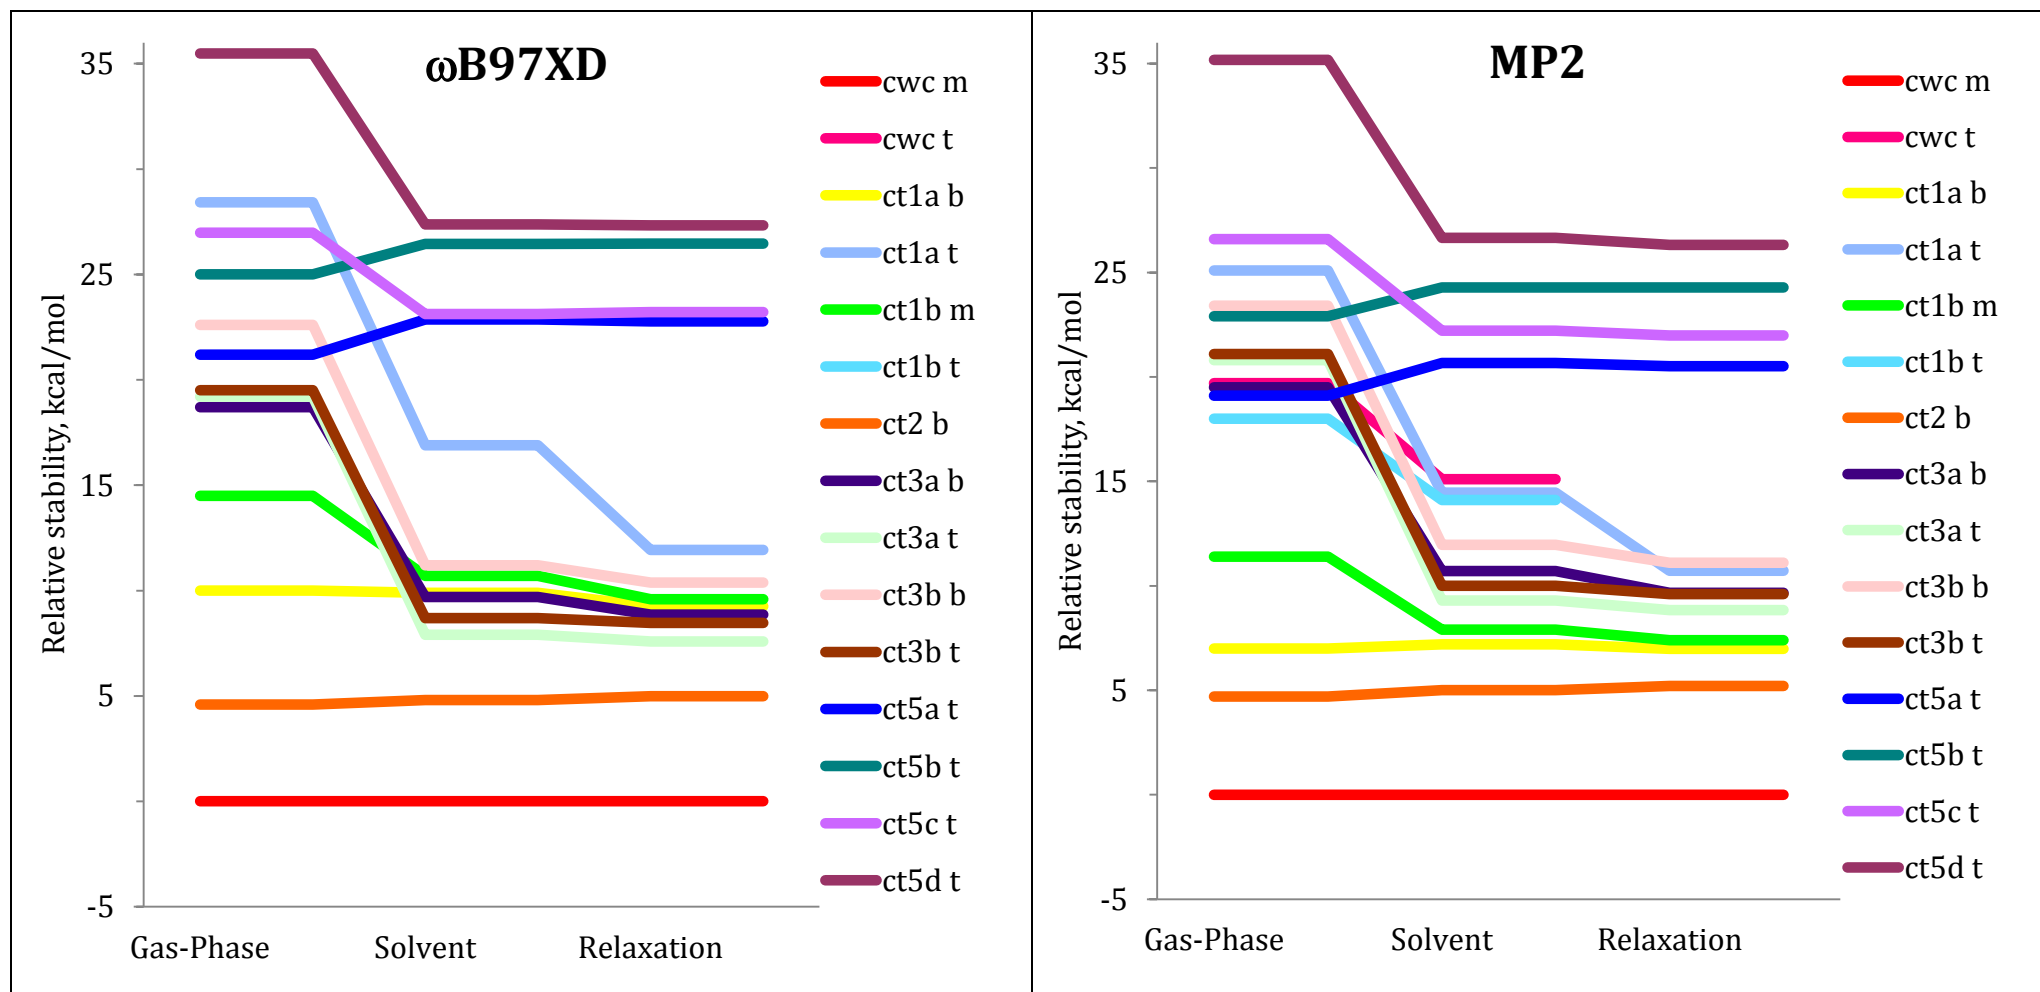

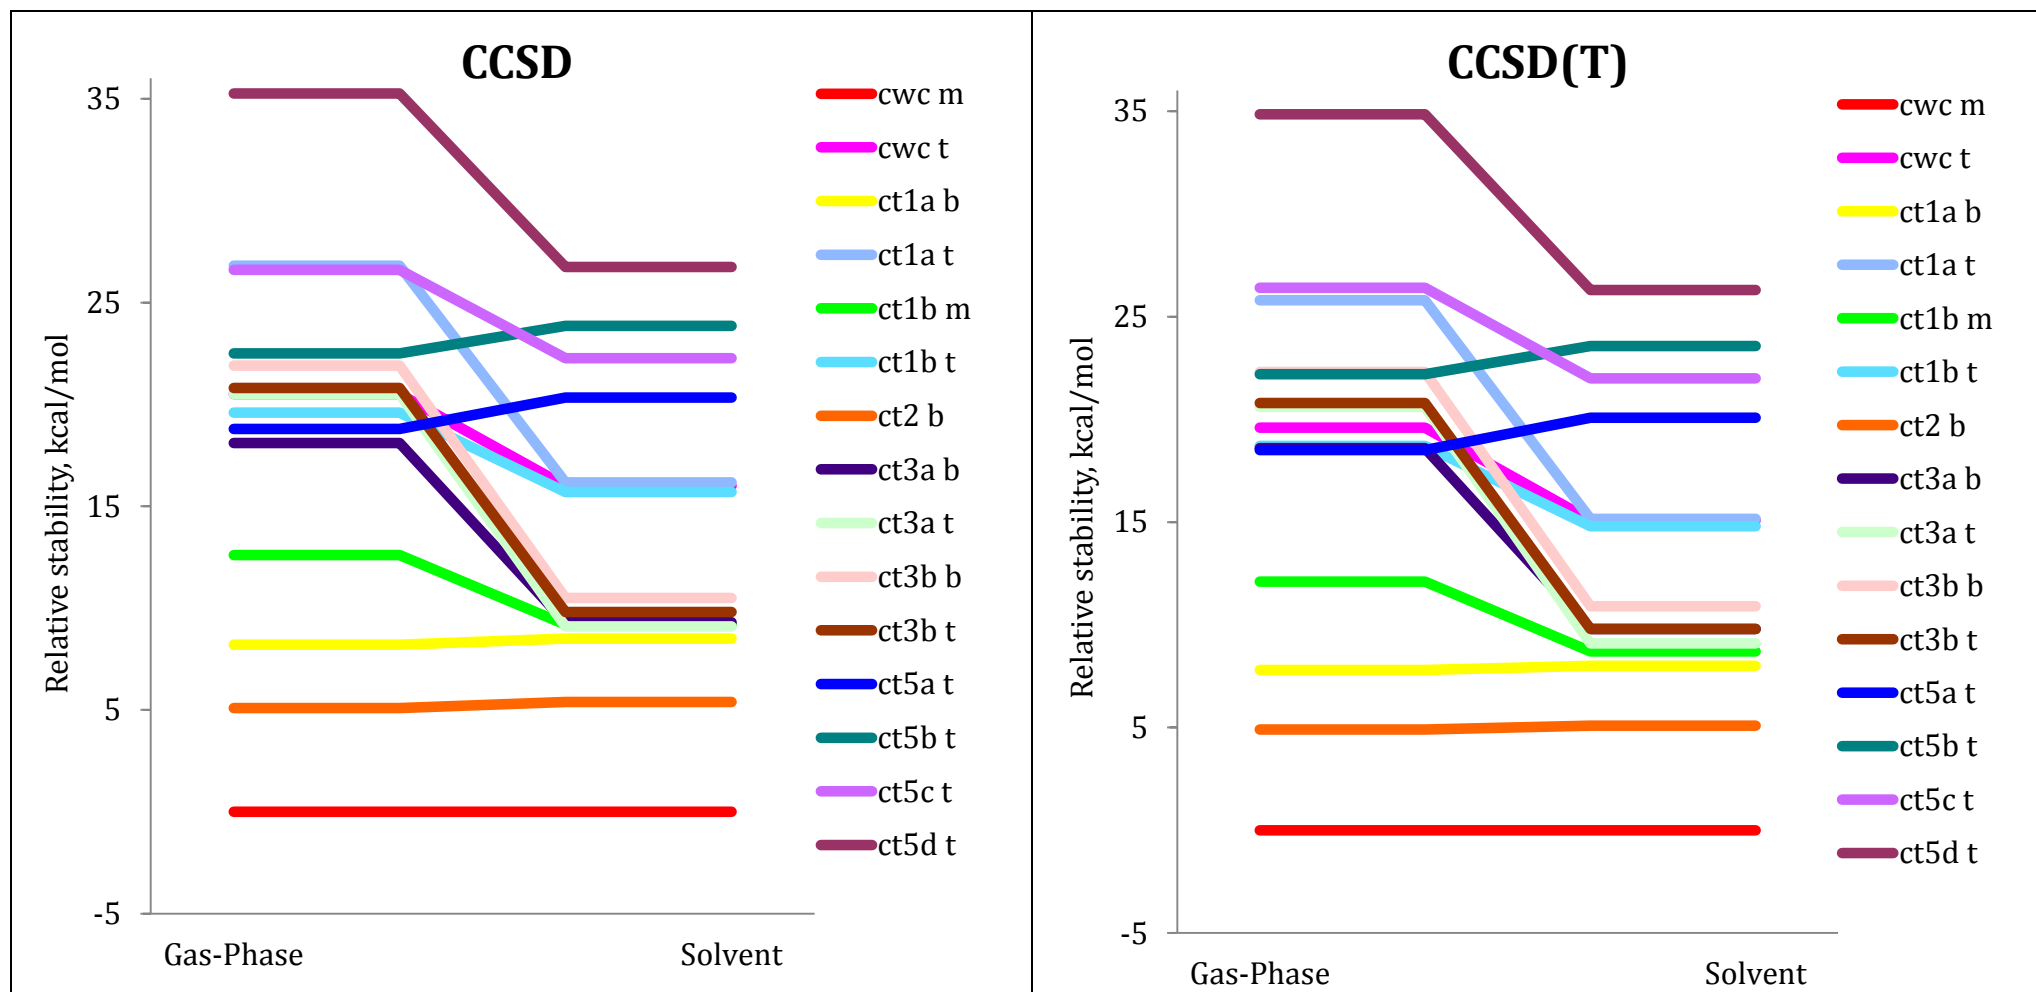

Fig. S2 Relative stabilities (in kcal/mol) of the cytosine tautomers binding with Na<sup>+</sup> by the  $\omega$ B97XD, MP2, CCSD and CCSD(T) methods.

**Table S3 Relative stabilities (in kcal/mol) of the cytosine tautomers binding with Mg<sup>2+</sup> by the ωB97XD, MP2, CCSD and CCSD(T) methods.**

| Mg <sup>2+</sup> |           |         |            |        |           |         |            |        |           |         |        |           |         |
|------------------|-----------|---------|------------|--------|-----------|---------|------------|--------|-----------|---------|--------|-----------|---------|
| ωB97XD           |           |         |            | MP2    |           |         |            | CCSD   |           |         |        | CCSD(T)   |         |
|                  | Gas-Phase | Solvent | Relaxation |        | Gas-Phase | Solvent | Relaxation |        | Gas-Phase | Solvent |        | Gas-Phase | Solvent |
| cwc m            | 0.0       | 0.0     | 0.0        | cwc m  | 0.0       | 0.0     | 0.0        | cwc m  | 0.0       | 0.0     | cwc m  | 0.0       | 0.0     |
| cwc t            | 28.4      | 16.8    | 16.5       | cwc t  | 27.4      | 16.4    | 16.2       | cwc t  | 29.2      | 18.3    | cwc t  | 28.0      | 17.0    |
| ct1a b           | 22.8      | 18.6    | 13.5       | ct1a b | 19.5      | 16.0    | 14.5       | ct1a b | 21.3      | 17.8    | ct1a b | 20.7      | 17.2    |
| ct1a t           | 47.4      | 26.7    | 25.1       | ct1a t | 43.9      | 22.8    | 21.5       | ct1a t | 46.3      | 25.2    | ct1a t | 44.9      | 23.8    |
| ct1b m           | 33.9      | 21.3    | 18.2       | ct1b m | 30.8      | 18.7    | 16.6       | ct1b m | 32.6      | 20.5    | ct1b m | 31.9      | 19.8    |
| ct1b t           | 33.1      | 23.4    | 23.3       | ct1b t | 29.8      | 19.6    | 19.5       | ct1b t | 32.0      | 21.9    | ct1b t | 30.9      | 20.8    |
| ct2 b            | -0.2      | 4.1     | 4.7        | ct2 b  | -0.2      | 4.3     | 5.1        | ct2 b  | 0.0       | 4.5     | ct2 b  | -0.1      | 4.4     |
| ct3a b           | 51.1      | 18.2    | 15.1       | ct3a b | 53.9      | 21.2    | 17.9       | ct3a b | 52.7      | 20.1    | ct3a b | 53.1      | 20.5    |
| ct3a t           | 45.6      | 10.7    | 8.9        | ct3a t | 49.4      | 14.6    | 12.4       | ct3a t | 50.5      | 15.7    | ct3a t | 50.1      | 15.3    |
| ct3b b           | 57.3      | 19.8    | 17.2       | ct3b b | 60.0      | 22.7    | 19.4       | ct3b b | 58.8      | 21.5    | ct3b b | 59.1      | 21.8    |
| ct3b t           | 43.5      | 10.7    | 9.3        | ct3b t | 47.4      | 14.4    | 12.7       | ct3b t | 48.3      | 15.2    | ct3b t | 47.9      | 14.9    |
| ct5a t           | 16.0      | 19.4    | 19.2       | ct5a t | 14.9      | 17.9    | 17.6       | ct5a t | 15.2      | 18.1    | ct5a t | 14.9      | 17.8    |
| ct5b t           | 13.6      | 21.3    | 22.2       | ct5b t | 12.5      | 19.7    | 20.6       | ct5b t | 12.6      | 19.8    | ct5b t | 12.4      | 19.6    |
| ct5c t           | 38.5      | 21.3    | 20.8       | ct5c t | 40.6      | 23.0    | 21.8       | ct5c t | 41.8      | 24.3    | ct5c t | 41.4      | 23.8    |
| ct5d t           | 45.5      | 25.6    | 24.8       | ct5d t | 47.6      | 27.4    | 26.0       | ct5d t | 49.0      | 28.8    | ct5d t | 48.5      | 28.2    |

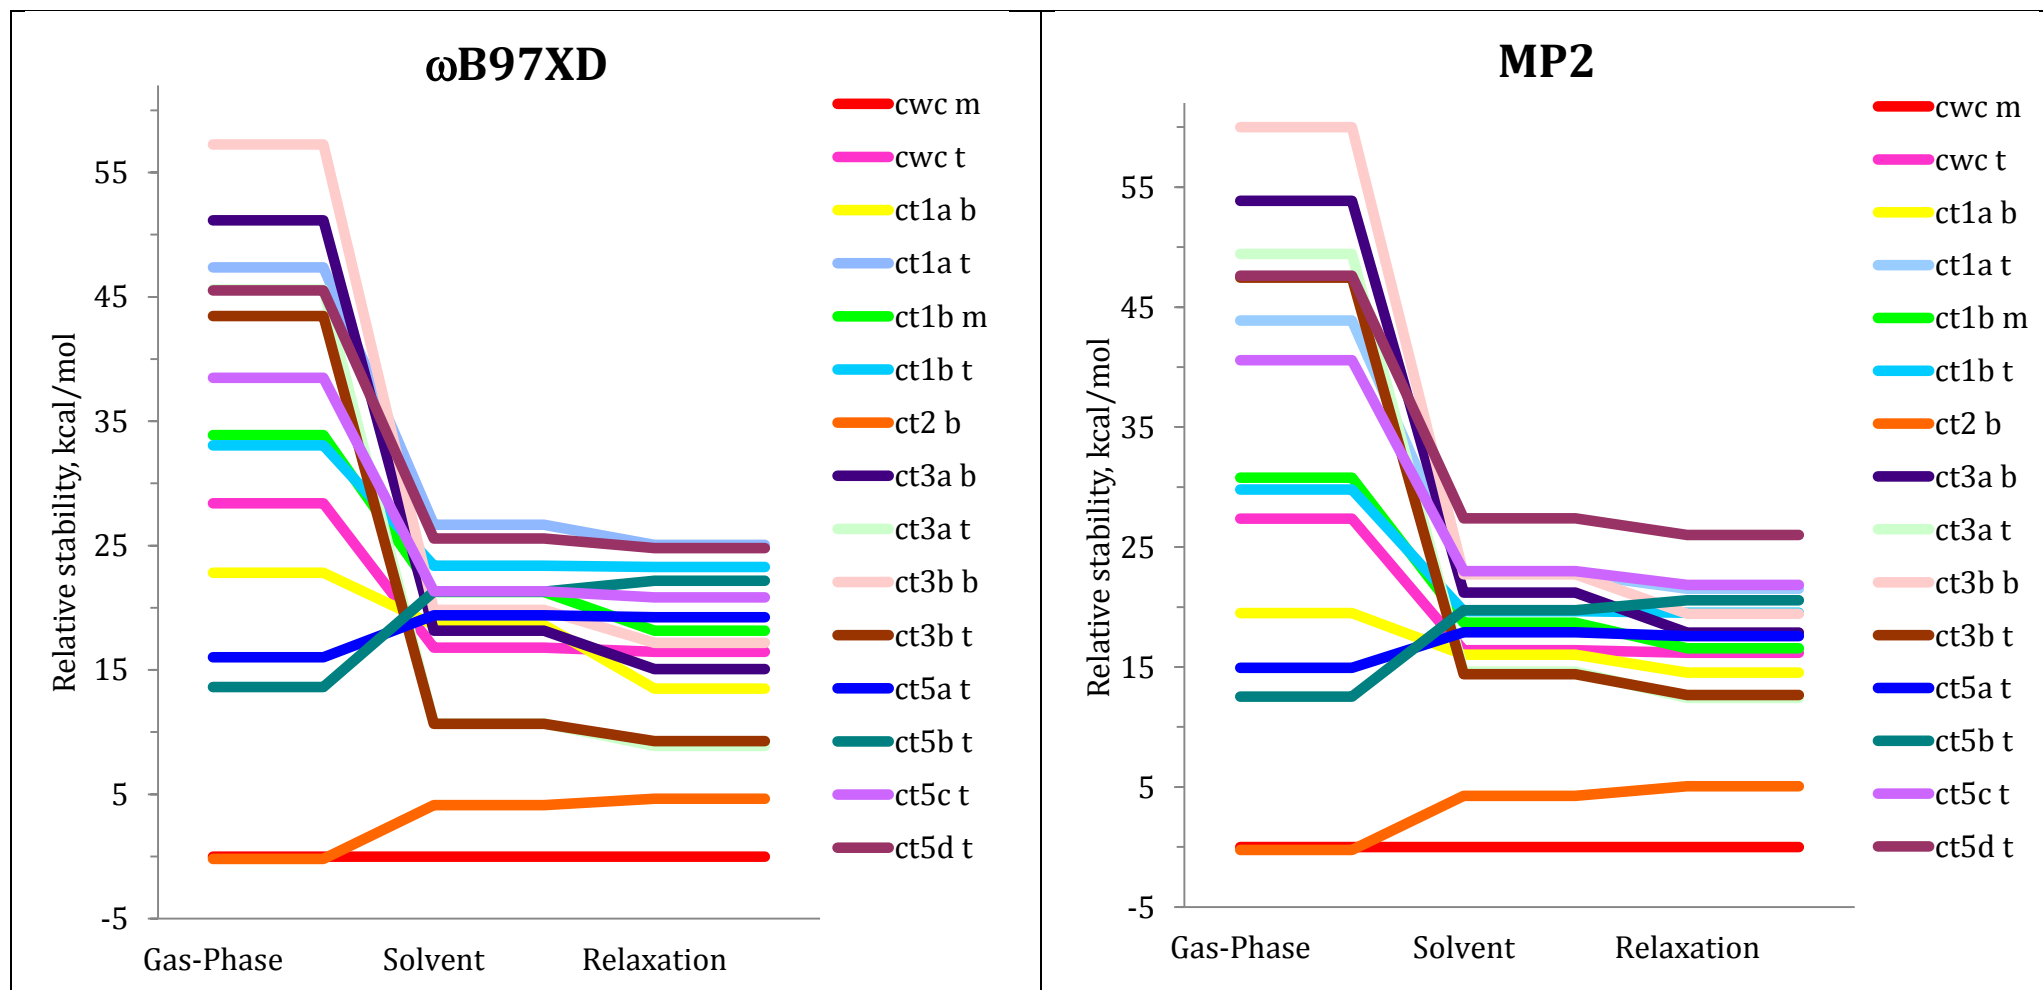



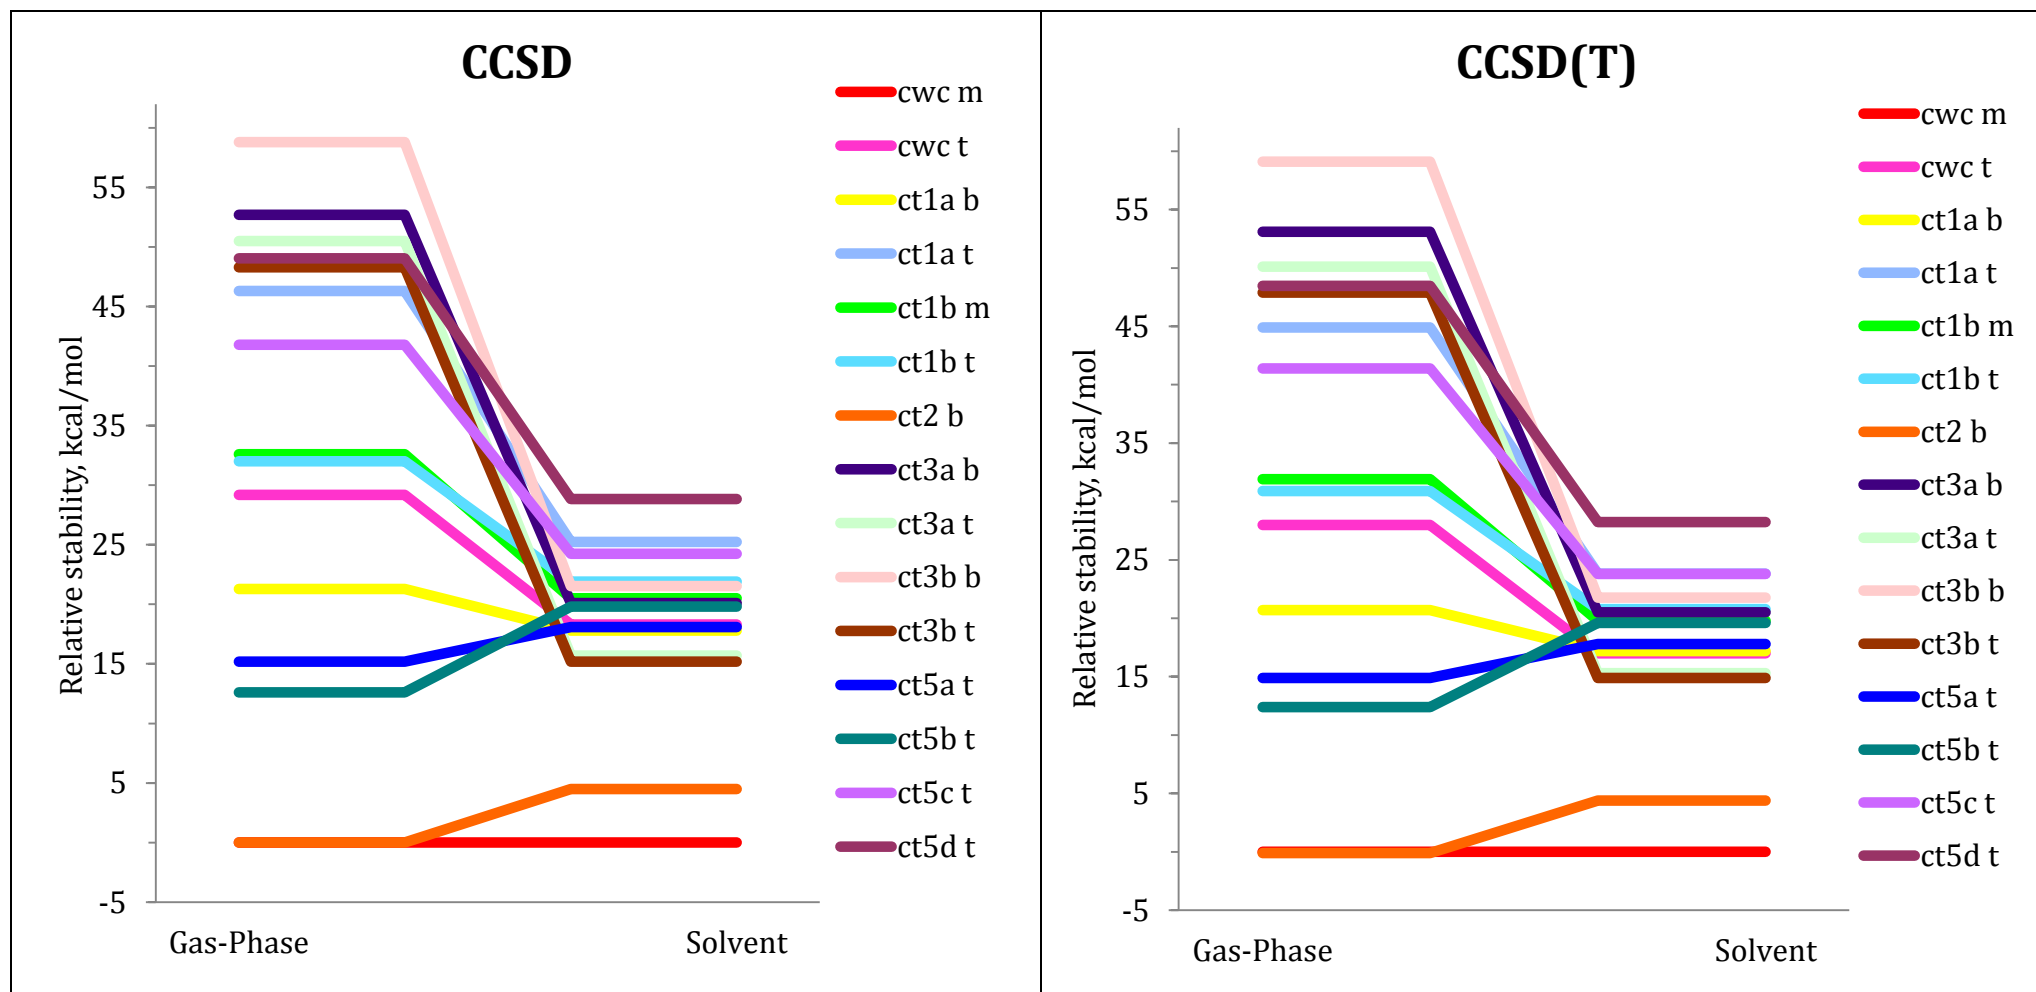

Fig. S3 Relative stabilities (in kcal/mol) of the cytosine tautomers binding with  $Mg^{2+}$  by the  $\omega$ B97XD, MP2, CCSD and CCSD(T) methods.

**Table S4 Relative stabilities (in kcal/mol) of the cytosine tautomers binding with Ca<sup>2+</sup> by the ωB97XD, MP2, CCSD and CCSD(T) methods.**

| Ca <sup>2+</sup> |           |         |            |        |           |         |            |        |           |         |         |           |         |
|------------------|-----------|---------|------------|--------|-----------|---------|------------|--------|-----------|---------|---------|-----------|---------|
| ωB97XD           |           |         |            | MP2    |           |         |            | CCSD   |           |         | CCSD(T) |           |         |
|                  | Gas-Phase | Solvent | Relaxation |        | Gas-Phase | Solvent | Relaxation |        | Gas-Phase | Solvent |         | Gas-Phase | Solvent |
| cwc m            | 0.0       | 0.0     | 0.0        | cwc m  | 0.0       | 0.0     | 0.0        | cwc m  | 0.0       | 0.0     | cwc m   | 0.0       | 0.0     |
| cwc t            | 29.1      | 16.9    | 17.2       | cwc t  | 27.0      | 15.6    | 16.1       | cwc t  | 28.3      | 16.9    | cwc t   | 27.3      | 15.9    |
| ct1a b           | 21.2      | 15.5    | 12.9       | ct1a b | 16.6      | 11.8    | 11.2       | ct1a b | 18.1      | 13.4    | ct1a b  | 17.6      | 12.9    |
| ct1a t           | 50.3      | 25.8    | 23.5       | ct1a t | 45.5      | 21.3    | 19.5       | ct1a t | 47.7      | 23.5    | ct1a t  | 46.4      | 22.2    |
| ct1b m           | 32.6      | 17.6    | 15.5       | ct1b m | 27.9      | 13.8    | 12.2       | ct1b m | 29.5      | 15.4    | ct1b m  | 28.9      | 14.8    |
| ct1b t           | 34.8      | 22.8    | 23.4       | ct1b t | 29.9      | 18.0    | 18.7       | ct1b t | 31.7      | 19.9    | ct1b t  | 30.8      | 18.9    |
| ct2 b            | 0.2       | 4.2     | 4.8        | ct2 b  | -0.1      | 4.4     | 5.0        | ct2 b  | 0.2       | 4.7     | ct2 b   | 0.1       | 4.6     |
| ct3a b           | 38.9      | 16.2    | 13.3       | ct3a b | 39.5      | 16.9    | 14.1       | ct3a b | 37.8      | 15.2    | ct3a b  | 38.2      | 15.6    |
| ct3a t           | 40.8      | 13.0    | 10.3       | ct3a t | 42.8      | 14.3    | 11.9       | ct3a t | 43.0      | 14.5    | ct3a t  | 42.8      | 14.3    |
| ct3b b           | 44.9      | 17.8    | 14.8       | ct3b b | 45.5      | 18.3    | 15.5       | ct3b b | 43.8      | 16.5    | ct3b b  | 44.0      | 16.7    |
| ct3b t           | 39.5      | 13.1    | 10.8       | ct3b t | 41.5      | 14.1    | 12.2       | ct3b t | 41.5      | 14.2    | ct3b t  | 41.4      | 14.0    |
| ct5a t           | 20.3      | 21.4    | 21.4       | ct5a t | 18.4      | 19.2    | 19.2       | ct5a t | 18.6      | 19.5    | ct5a t  | 18.4      | 19.2    |
| ct5b t           | 18.0      | 23.4    | 24.4       | ct5b t | 15.7      | 21.4    | 22.3       | ct5b t | 15.8      | 21.4    | ct5b t  | 15.6      | 21.3    |
| ct5c t           | 36.0      | 25.6    | 23.7       | ct5c t | 36.7      | 25.0    | 23.0       | ct5c t | 37.2      | 25.6    | ct5c t  | 36.9      | 25.3    |
| ct5d t           | 43.0      | 30.0    | 27.8       | ct5d t | 43.8      | 29.7    | 27.3       | ct5d t | 44.5      | 30.4    | ct5d t  | 44.0      | 30.4    |

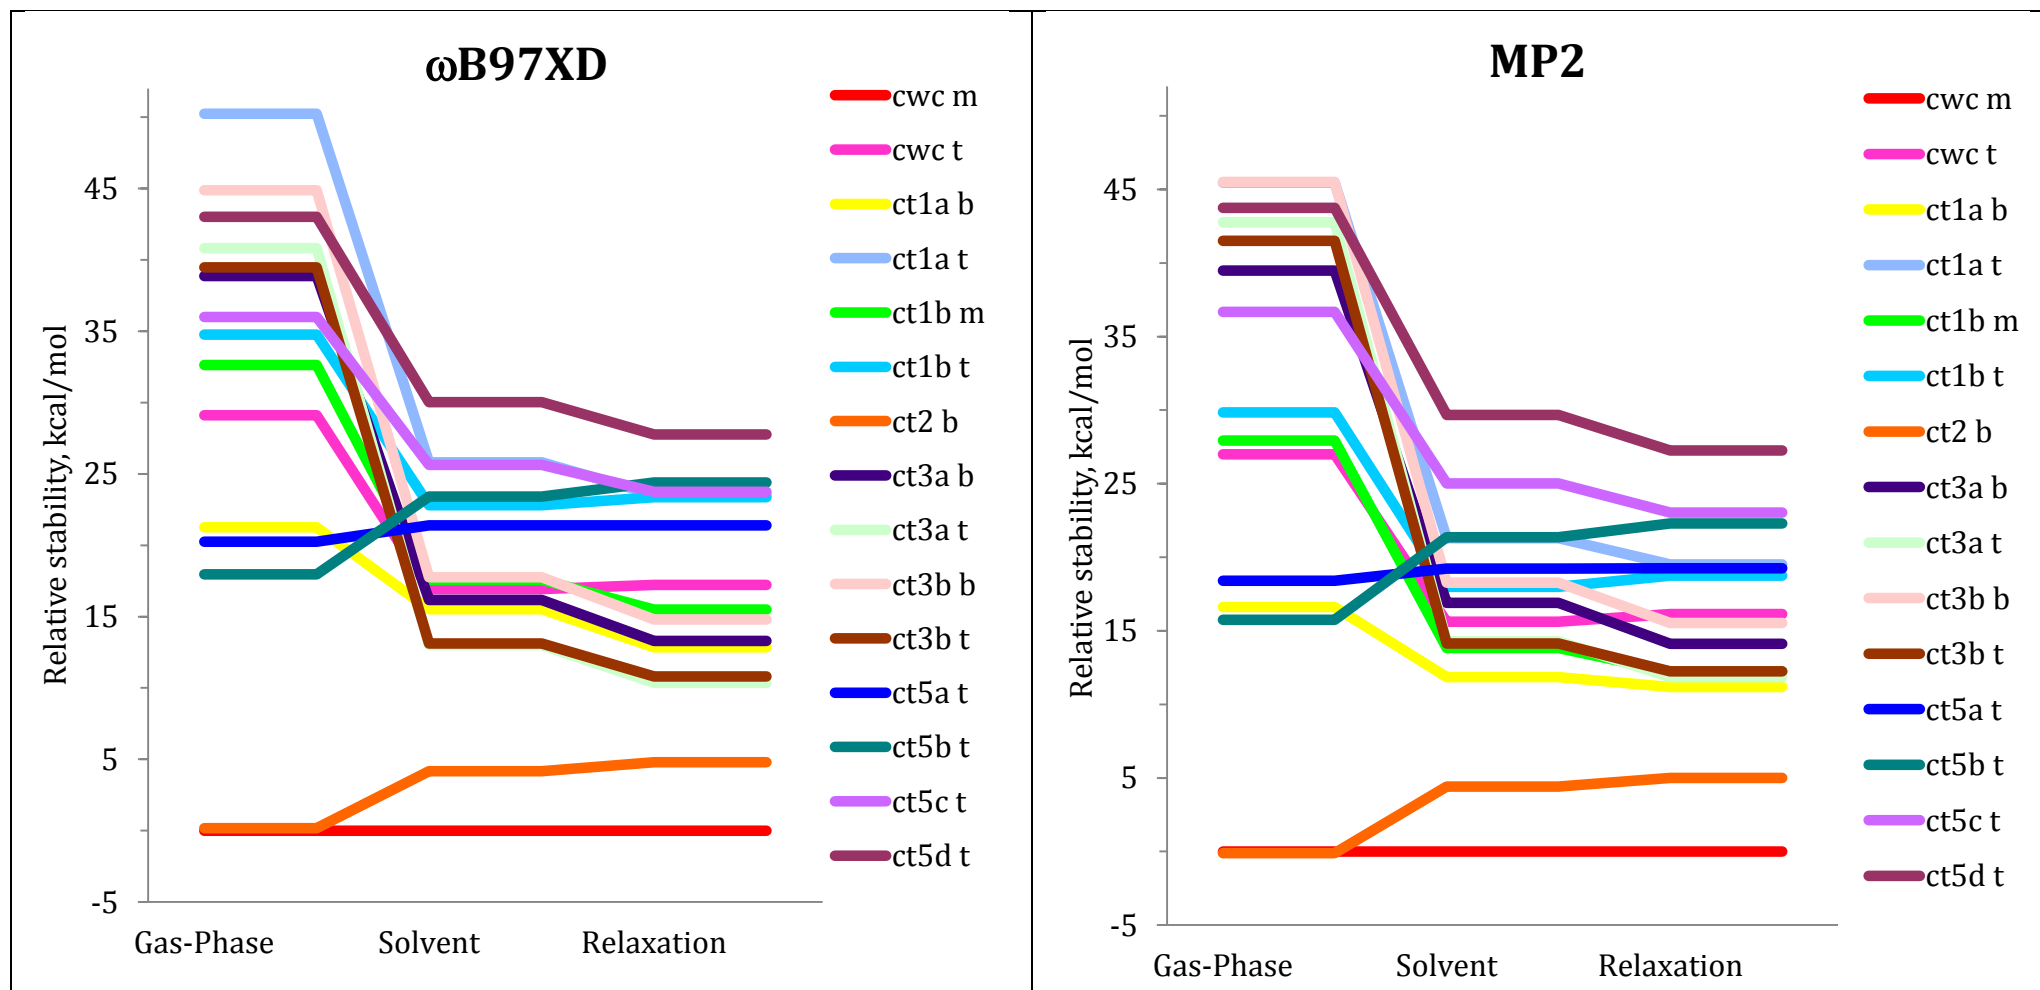

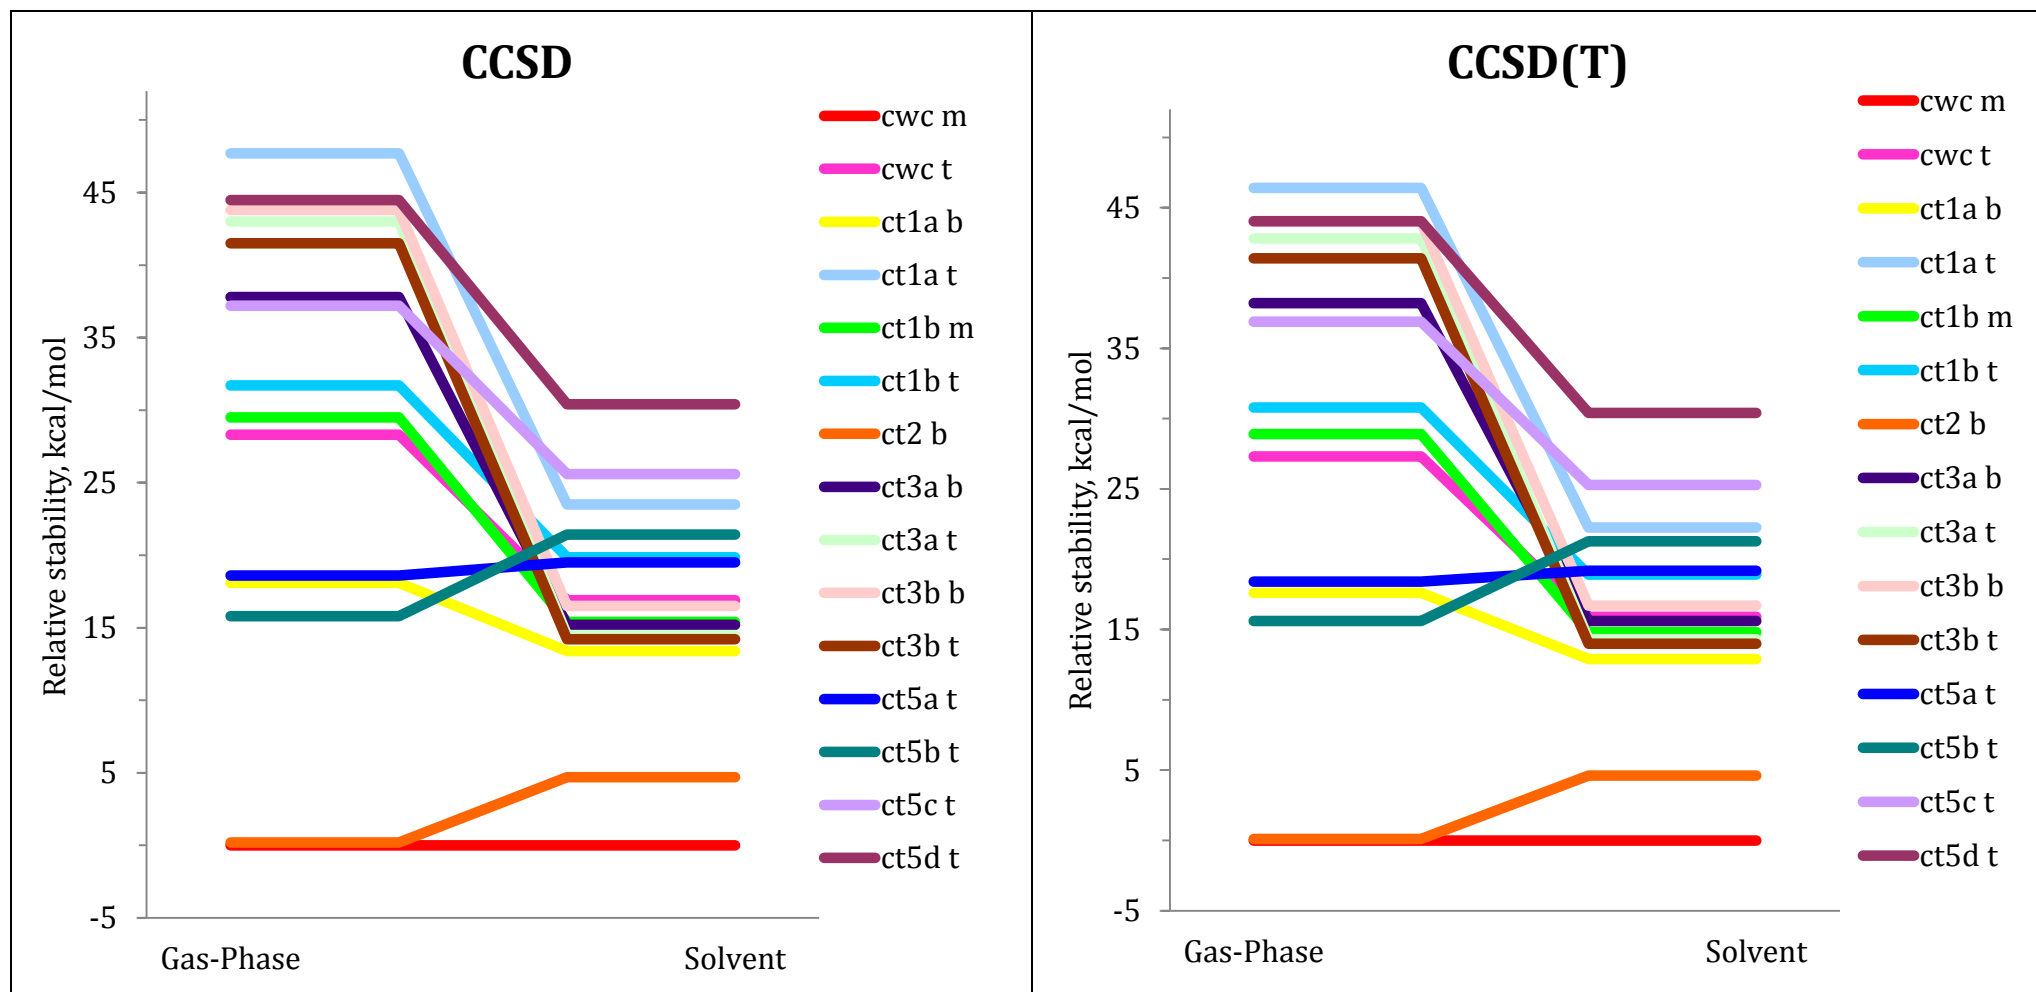

**Fig. S4** Relative stabilities (in kcal/mol) of the cytosine tautomers binding with  $\text{Ca}^{2+}$  by the  $\omega\text{B97XD}$ , MP2, CCSD and CCSD(T) methods.

**Table S5 Relative stabilities (in kcal/mol) of the cytosine tautomers binding with Zn<sup>2+</sup> by the ωB97XD, MP2, CCSD and CCSD(T) methods.**

| Zn <sup>2+</sup> |           |         |            |        |           |         |            |        |           |         |         |           |         |
|------------------|-----------|---------|------------|--------|-----------|---------|------------|--------|-----------|---------|---------|-----------|---------|
| ωB97XD           |           |         |            | MP2    |           |         |            | CCSD   |           |         | CCSD(T) |           |         |
|                  | Gas-Phase | Solvent | Relaxation |        | Gas-Phase | Solvent | Relaxation |        | Gas-Phase | Solvent |         | Gas-Phase | Solvent |
| cwc m            | 0.0       | 0.0     | 0.0        | cwc m  | 0.0       | 0.0     | 0.0        | cwc m  | 0.0       | 0.0     | cwc m   | 0.0       | 0.0     |
| cwc t            | 23.0      | 13.8    | 13.6       | cwc t  | 21.0      | 12.6    | 12.4       | cwc t  | 23.5      | 15.1    | cwc t   | 22.2      | 13.8    |
| ct1a b           | 23.3      | 16.8    | 8.9        | ct1a b | 19.9      | 14.7    | 6.2        | ct1a b | 21.4      | 16.1    | ct1a b  | 21.2      | 16.0    |
| ct1a t           | 40.0      | 23.7    | 22.1       | ct1a t | 36.6      | 19.4    | 17.7       | ct1a t | 39.6      | 22.4    | ct1a t  | 38.1      | 20.9    |
| ct1b m           | 35.4      | 21.0    | 14.7       | ct1b m | 32.3      | 18.6    | 12.2       | ct1b m | 33.8      | 20.0    | ct1b m  | 33.5      | 19.7    |
| ct1b t           | 27.1      | 20.6    | 20.3       | ct1b t | 23.5      | 16.2    | 15.8       | ct1b t | 26.2      | 18.9    | ct1b t  | 25.1      | 17.8    |
| ct2 b            | -0.1      | 3.7     | 4.1        | ct2 b  | -0.1      | 3.9     | 4.2        | ct2 b  | 0.1       | 4.1     | ct2 b   | 0.0       | 4.0     |
| ct3a b           | 62.6      | 21.4    | 18.4       | ct3a b | 62.6      | 22.3    | 17.9       | ct3a b | 60.2      | 20.0    | ct3a b  | 61.0      | 20.8    |
| ct3a t           | 37.4      | 6.0     | 3.4        | ct3a t | 38.6      | 5.1     | 4.2        | ct3a t | 39.9      | 6.4     | ct3a t  | 40.0      | 6.5     |
| ct3b b           | 68.5      | 23.4    | 20.1       | ct3b b | 69.0      | 24.6    | 19.6       | ct3b b | 66.5      | 22.1    | ct3b b  | 67.0      | 22.6    |
| ct3b t           | 35.5      | 4.9     | 3.1        | ct3b t | 36.5      | 5.5     | 3.8        | ct3b t | 37.6      | 6.5     | ct3b t  | 37.7      | 6.6     |
| ct5a t           | 8.5       | 15.1    | 14.4       | ct5a t | 7.4       | 13.3    | 12.5       | ct5a t | 8.7       | 14.6    | ct5a t  | 8.3       | 14.3    |
| ct5b t           | 7.1       | 17.3    | 17.3       | ct5b t | 5.8       | 15.5    | 15.5       | ct5b t | 6.8       | 16.5    | ct5b t  | 6.6       | 16.3    |
| ct5c t           | 27.5      | 13.8    | 13.2       | ct5c t | 26.8      | 12.2    | 11.5       | ct5c t | 28.6      | 14.0    | ct5c t  | 28.6      | 14.0    |
| ct5d t           | 34.3      | 17.9    | 17.1       | ct5d t | 33.6      | 16.5    | 15.6       | ct5d t | 35.7      | 18.5    | ct5d t  | 35.5      | 18.3    |

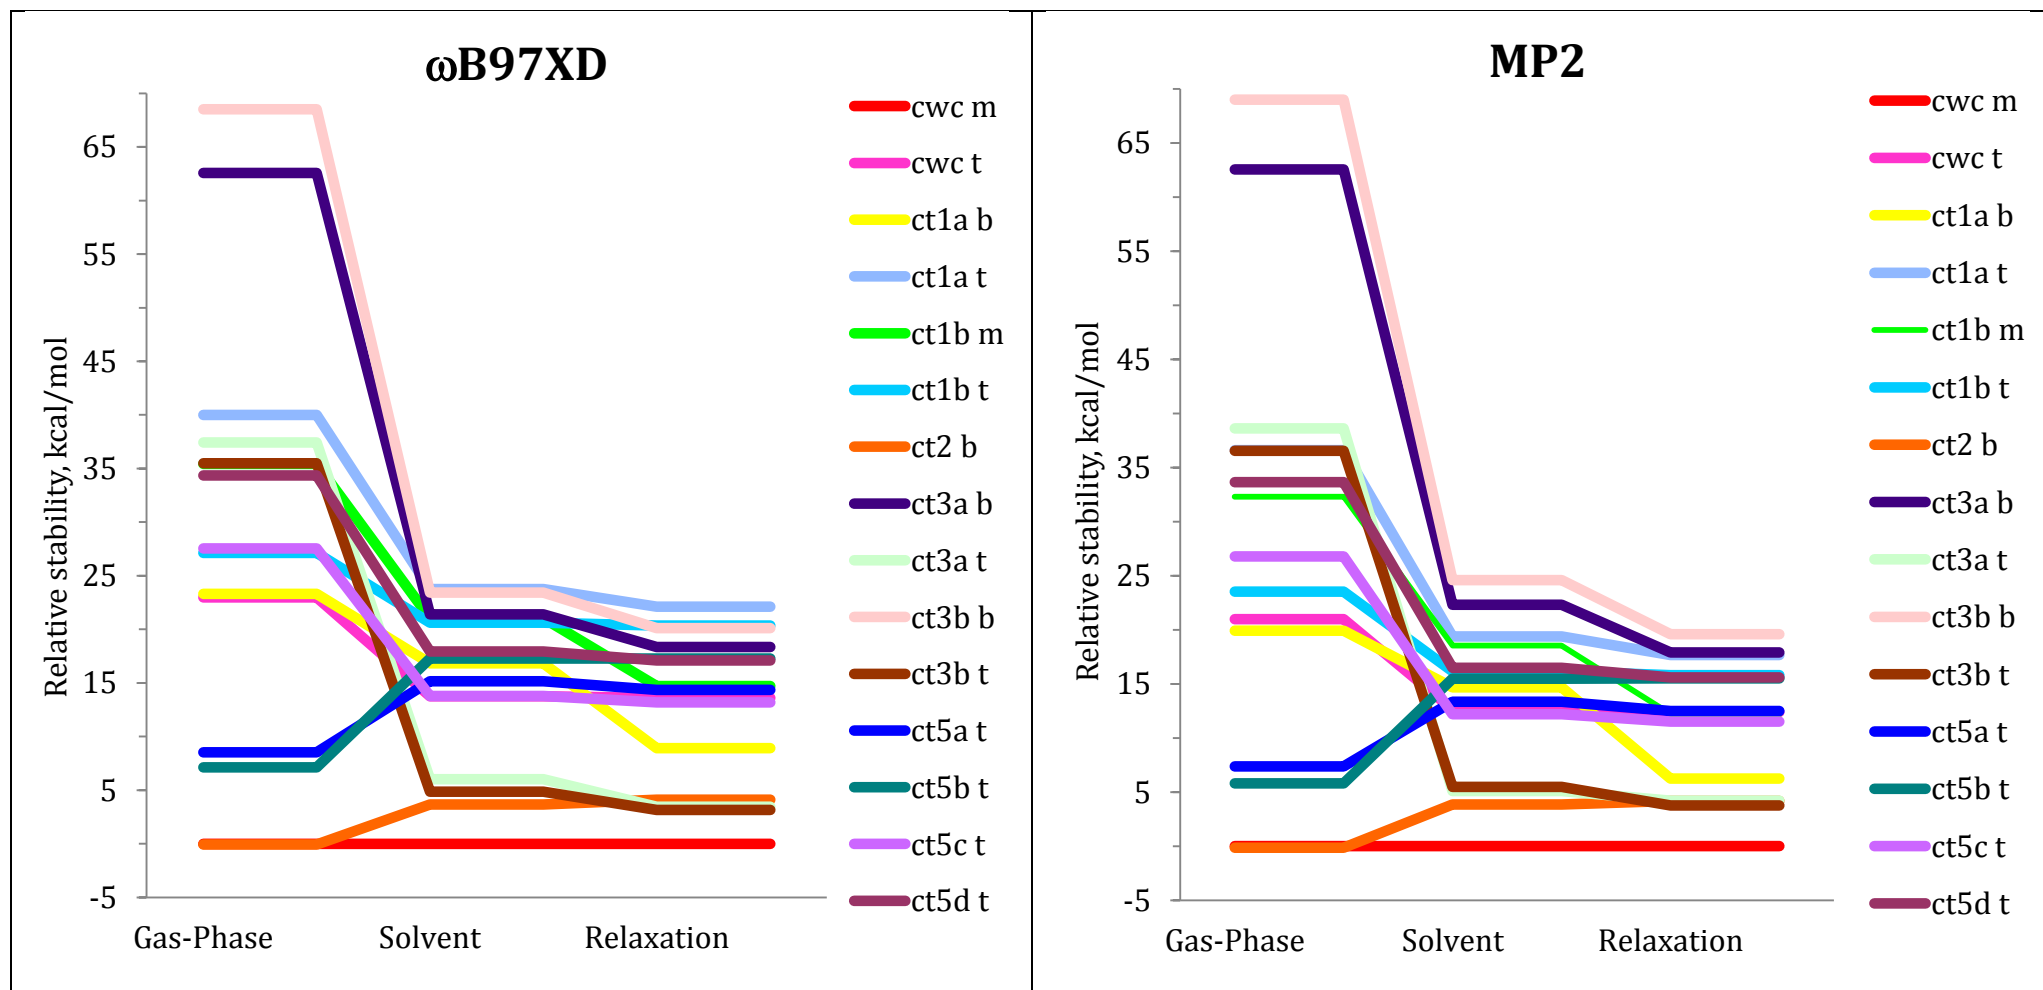

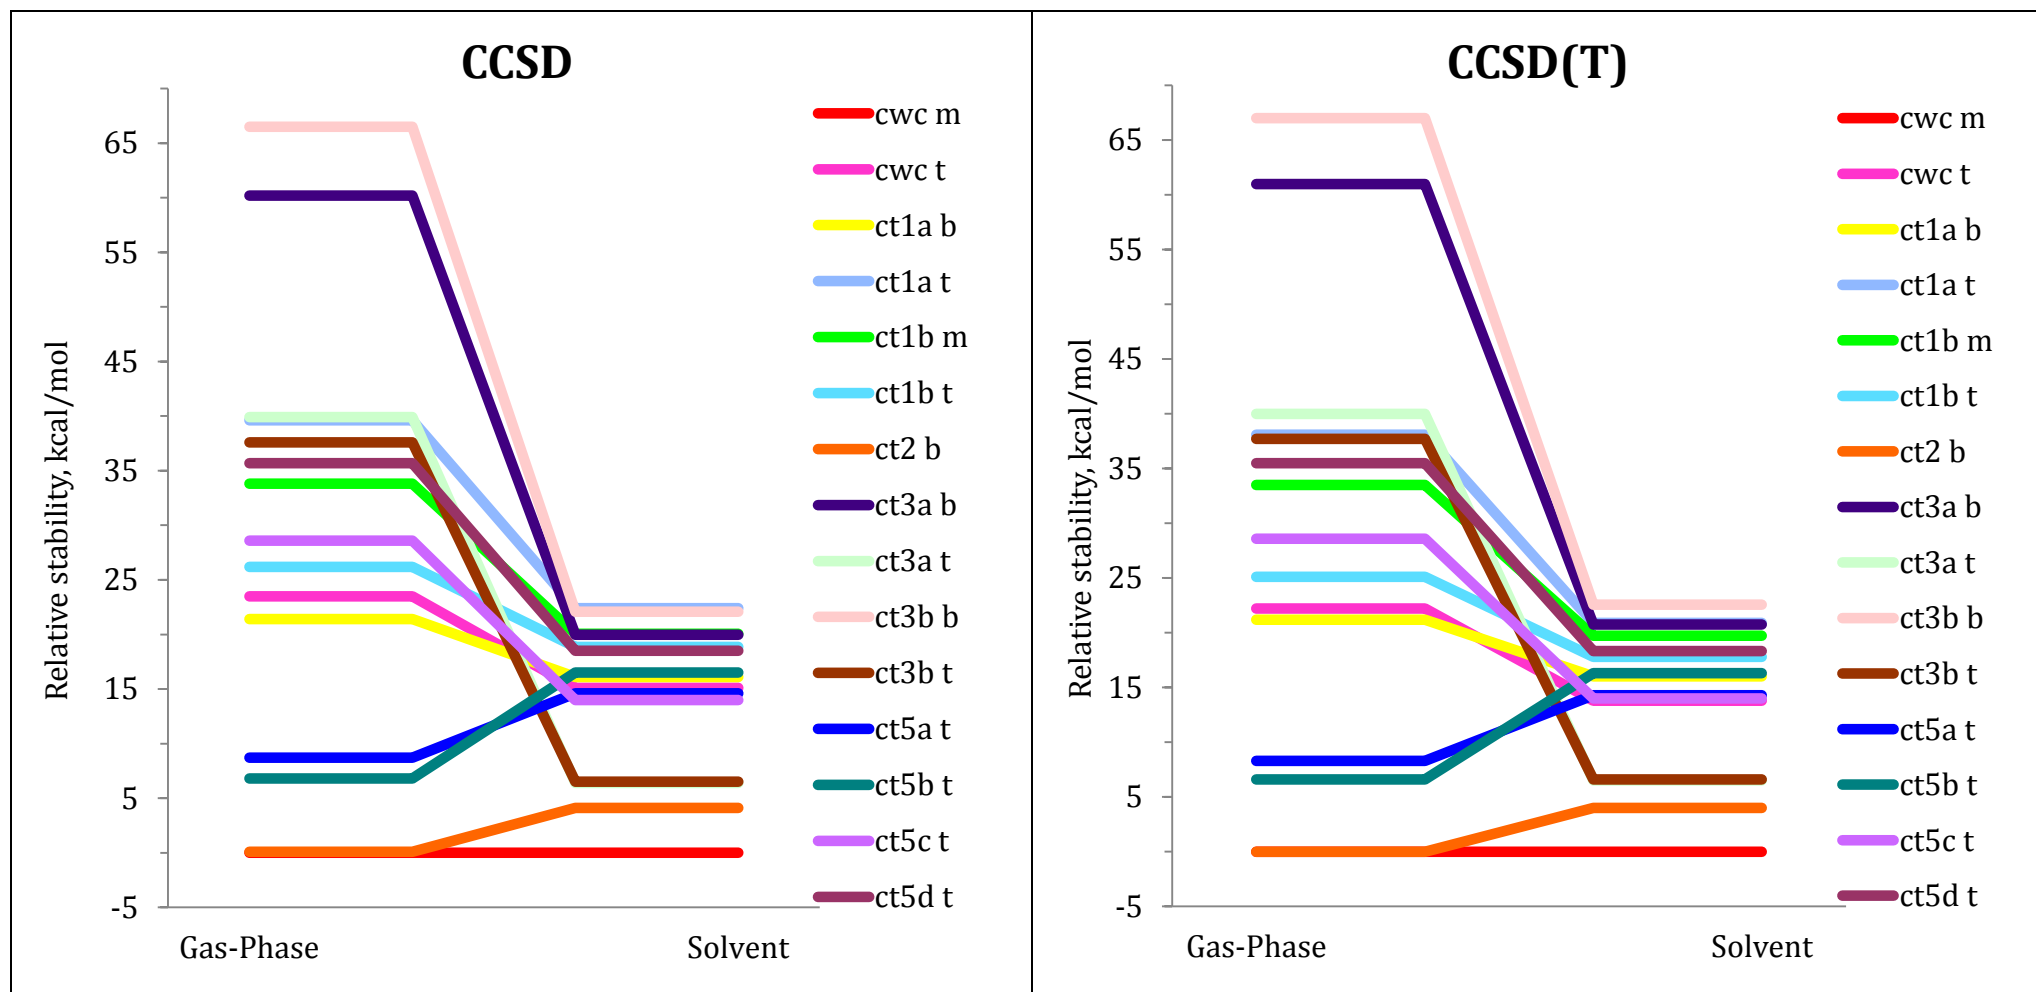

Fig. S5 Relative stabilities (in kcal/mol) of the cytosine tautomers binding with  $Zn^{2+}$  by the  $\omega$ B97XD, MP2, CCSD and CCSD(T) methods.
